# Supplementary material
Source: publisher figshare collection journal article supplement (https://acs.figshare.com/ndownloader/files/11070518)
Supplement: Supplementary file 1 [file 11070518]

# **Investigating the Secondary Structure of Membrane Peptides Utilizing Multiple $^2\text{H}$ -labeled Hydrophobic Amino Acids via Electron Spin Echo Envelope Modulation (ESEEM) Spectroscopy**

Lishan Liu, Indra D. Sahu, Lauren Bottorf, Robert M. McCarrick and Gary A. Lorigan\*  
Department of Chemistry and Biochemistry, Miami University, Oxford, OH, 45056, USA

\* Corresponding author. Email: [lorigag@miamioh.edu](mailto:lorigag@miamioh.edu), Ph: 513-5293338

## Supplemental Figures:

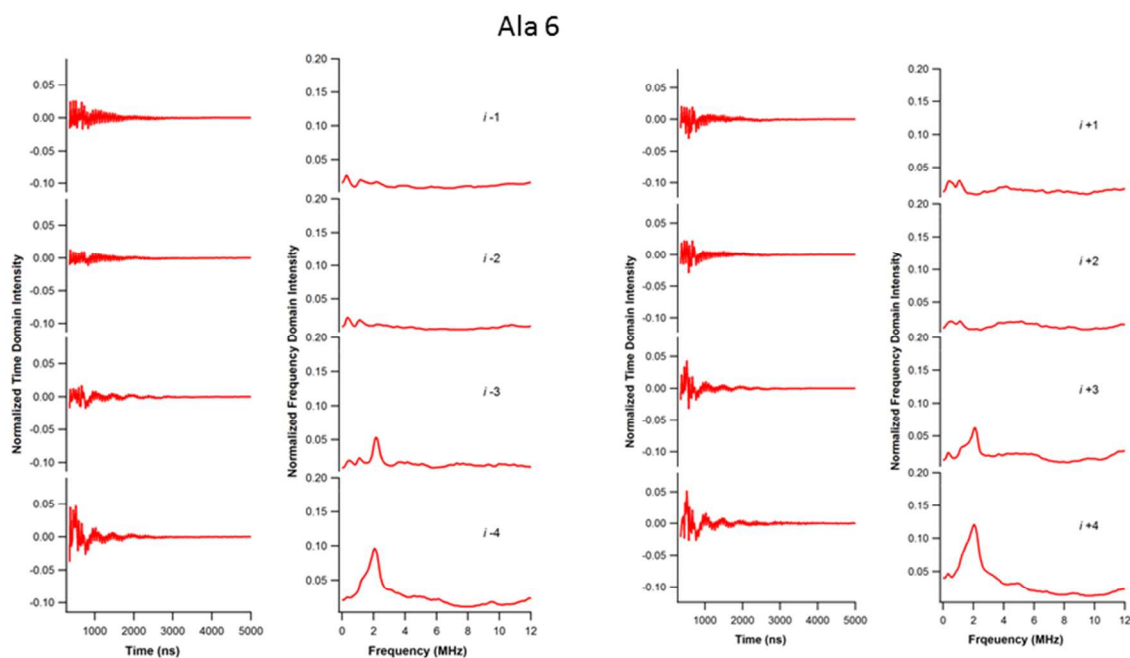

**Figure S1:** Three-pulse ESEEM experimental data of AChR M2 $\delta$  with  $^2\text{H}$ -labeled  $\text{d}_3$  Ala6 at the N-terminal (-) and C-terminal (+) sides in DMPC/DHPC (3.5:1) bicelles at  $\tau=200$  ns for the  $i+1$  to  $i+4$  in Time domain and Frequency domain.

## Ala 12

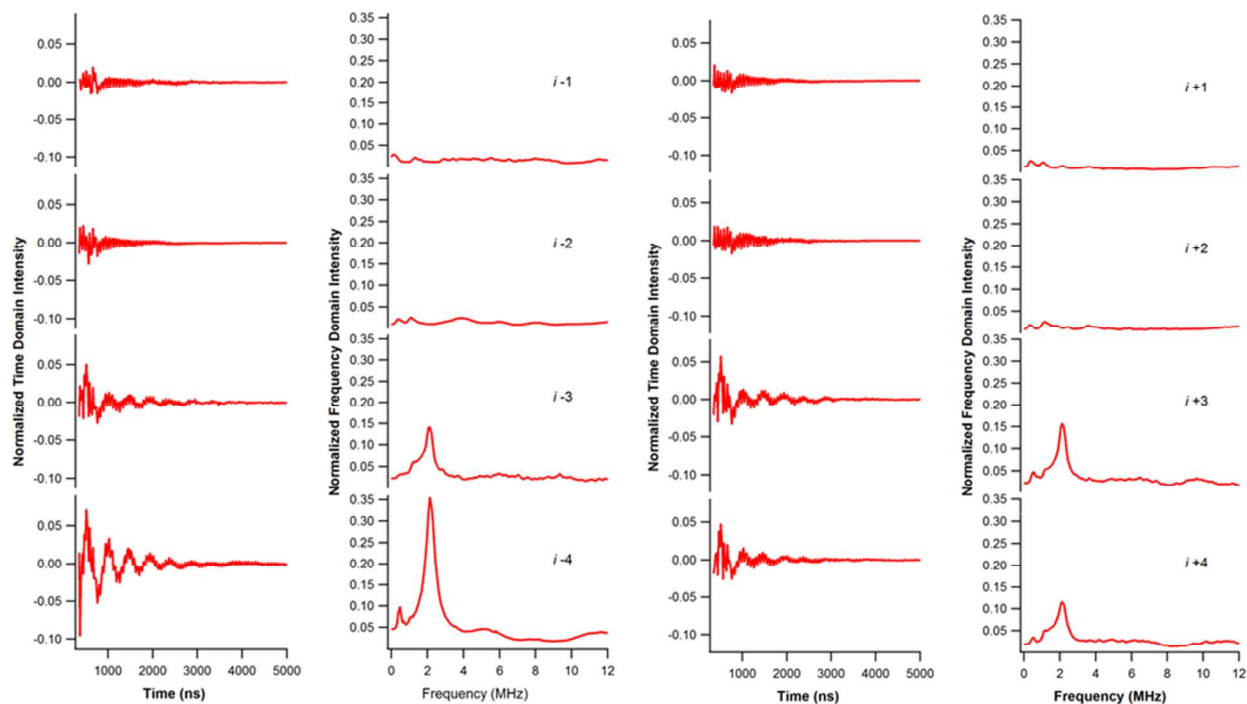

**Figure S2:** Three-pulse ESEEM experimental data of AChR M2 $\delta$  with  $^2\text{H}$ -labeled  $\text{d}_3$  Ala12 at the N-terminal (-) and C-terminal (+) sides in DMPC/DHPC (3.5:1) bicelles at  $\tau=200$  ns for the  $i+1$  to  $i+4$  in Time domain and Frequency domain.

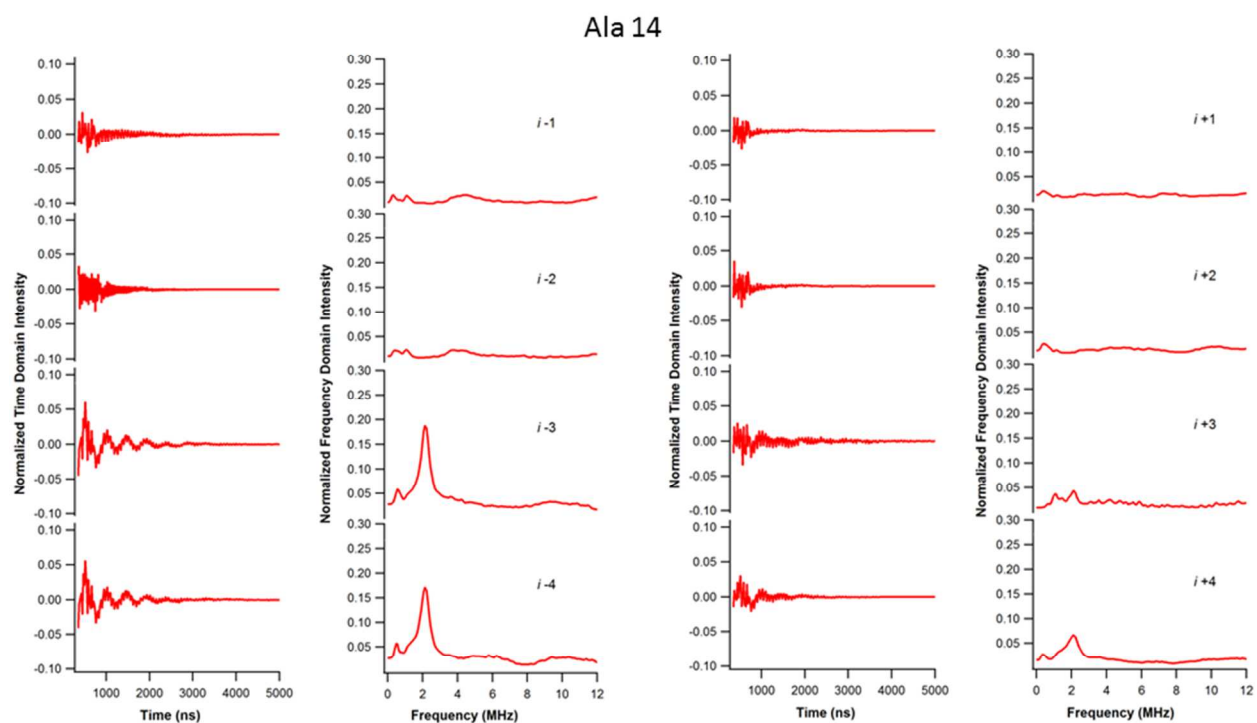

**Figure S3:** Three-pulse ESEEM experimental data of AChR M2δ with  $^2\text{H}$ -labeled  $\text{d}_3$  Ala14 at the N-terminal (-) and C-terminal (+) sides in DMPC/DHPC (3.5:1) bicelles at  $\tau=200$  ns for the  $i+1$  to  $i+4$  in Time domain and Frequency domain.

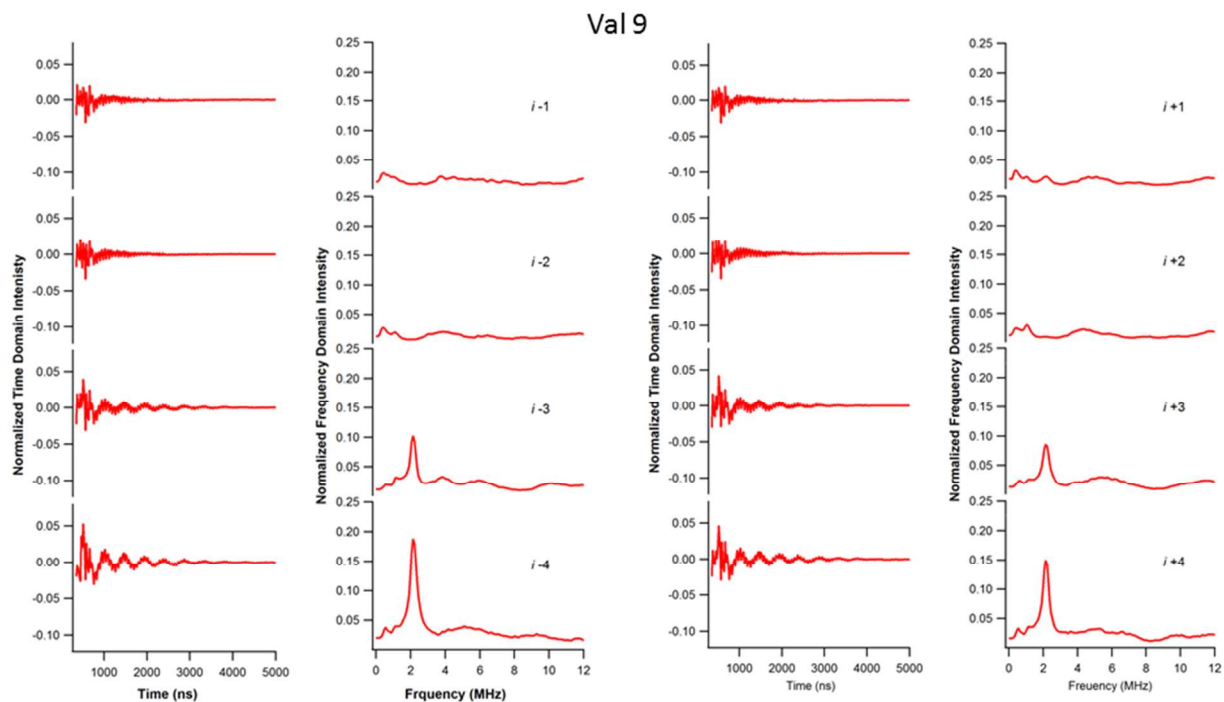

**Figure S4:** Three-pulse ESEEM experimental data of AChR M2 $\delta$  with  $^2\text{H}$ -labeled  $\text{d}_8$  Val9 at the N-terminal (-) and C-terminal (+) sides in DMPC/DHPC (3.5:1) bicelles at  $\tau=200$  ns for the  $i+1$  to  $i+4$  in Time domain and Frequency domain.

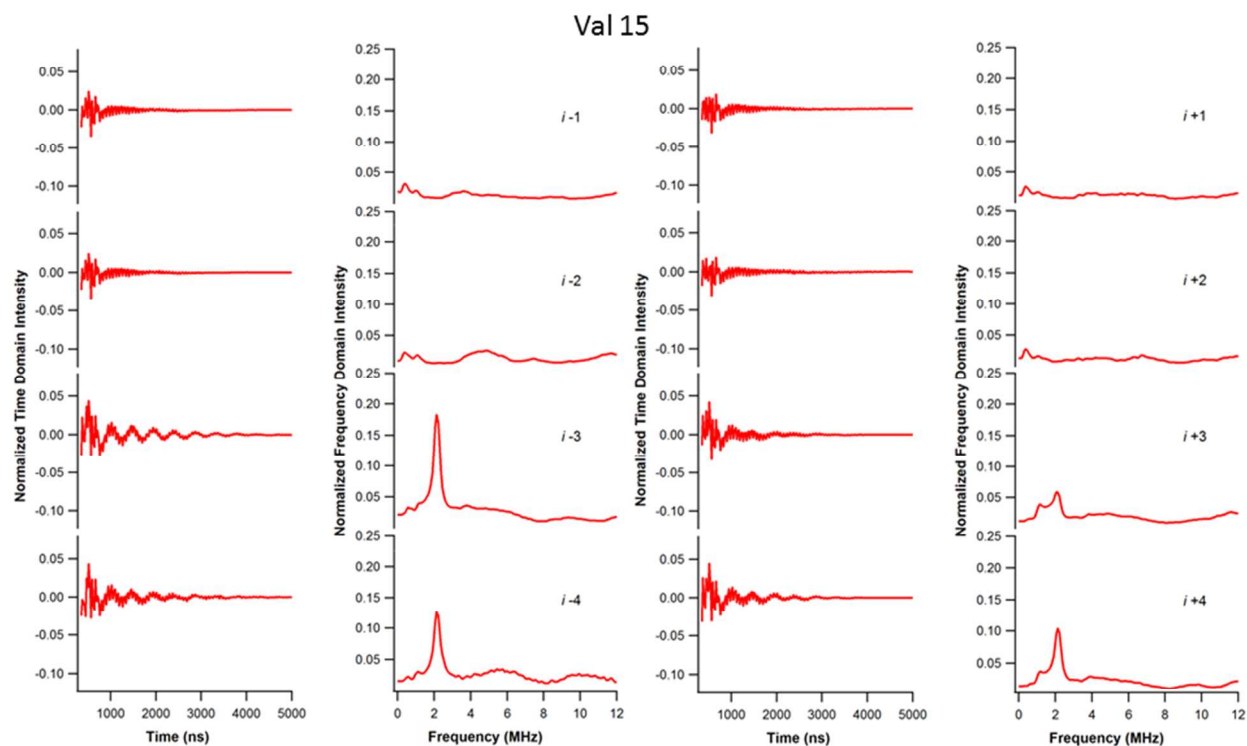

**Figure S5:** Three-pulse ESEEM experimental data of AChR M2 $\delta$  with  $^2\text{H}$ -labeled  $d_8$  Val15 at the N-terminal (-) and C-terminal (+) sides in DMPC/DHPC (3.5:1) bicelles at  $\tau=200$  ns for the  $i+1$  to  $i+4$  in Time domain and Frequency domain.

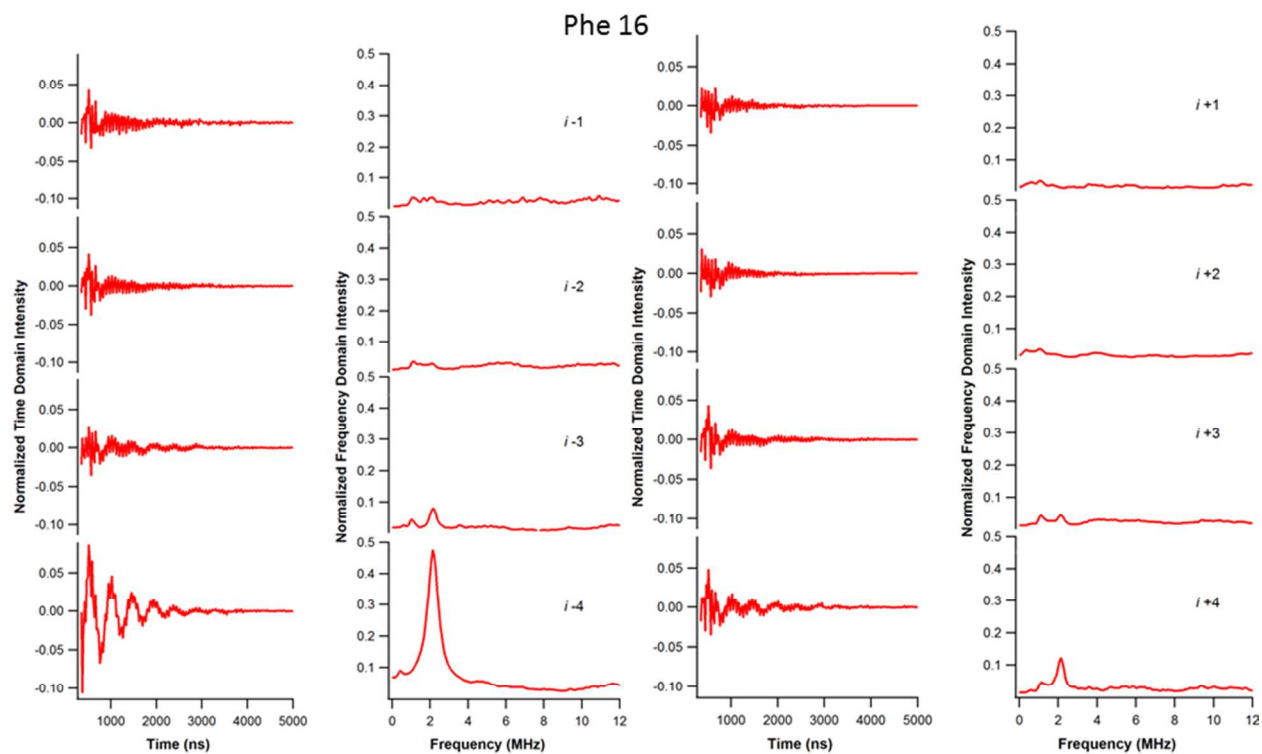

**Figure S6:** Three-pulse ESEEM experimental data of AChR M2 $\delta$  with  $^2\text{H}$ -labeled  $\text{d}_8$  Phe16 at the N-terminal (-) and C-terminal (+) sides in DMPC/DHPC (3.5:1) bicelles at  $\tau=200$  ns for the  $i+1$  to  $i+4$  in Time domain and Frequency domain.
